# Supplementary material for: Assessing the impact of an antisolvent-regulated ZnCl2 water-in-salt electrolyte on solvation structure: a multiscale computational validation for aqueous Zn-ion battery application
Source: Royal Society of Chemistry journal article supplement (doi:10.1039/d4ta03961k), 2024-01-01
Supplement: d4ta03961k1.pdf [file d4ta03961k1.pdf]

## Supporting Information

### Assessing the impact of antisolvent-regulated ZnCl<sub>2</sub> water-in-salt electrolyte on solvation structure: a multiscale computational validation for aqueous Zn-ion battery application

**Asis Sethi,<sup>1,2</sup> Chaithra Rajeev,<sup>1</sup> Anil Kumar U.,<sup>1,2</sup> Parul Sharma,<sup>3</sup> Anurag Prakash Sunda,<sup>3\*</sup>  
and Vishal M. Dhavale<sup>1,2\*</sup>**

<sup>1</sup> CSIR-Central Electrochemical Research Institute, CSIR Madras Complex, Taramani, Chennai 600 113, Tamil Nadu, India

<sup>2</sup> Academy of Scientific and Innovative Research (AcSIR), Ghaziabad- 201002, India

\*Email: vishal@cecri.res.in

<sup>3</sup> Department of Chemistry, J. C. Bose University of Science and Technology, YMCA, Faridabad 121006, India

\*Email: anurag@jcboseust.ac.in; anurag.sunda@gmail.com

## Table of Contents

|                                                                                      |             |
|--------------------------------------------------------------------------------------|-------------|
| <b>Section S1:</b> Solubility test                                                   | <b>3</b>    |
| <b>Section S2:</b> Raman and Infrared Spectroscopy                                   | <b>3-4</b>  |
| <b>Section S3:</b> Spatial Distribution Function Calculation                         | <b>5</b>    |
| <b>Section S4:</b> X-Ray Diffraction                                                 | <b>5</b>    |
| <b>Section S5:</b> Field-Emission Scanning Electron Microscopy (FE-SEM)              | <b>6</b>    |
| <b>Section S6:</b> Electrochemical Characterization                                  | <b>6-7</b>  |
| <b>Section S7:</b> Electrochemical Impedance Spectroscopy (EIS)                      | <b>7</b>    |
| <b>Section S8:</b> Galvanostatic Charge Discharge Study                              | <b>7-10</b> |
| <b>Section S9:</b> Digital Photograph of Zn-foil anode after study                   | <b>10</b>   |
| <b>Section S10:</b> Scanning Electron Microscopy (SEM) images of Zn-foil after study | <b>11</b>   |
| <b>Section S11:</b> Coordination number of different atoms                           | <b>11</b>   |
| <b>Section S12:</b> Diffusion coefficients from MD simulation                        | <b>12</b>   |
| <b>Section S13:</b> Efficiency of PBAR in half-cell and Zn//PBAR full cell           | <b>12</b>   |

## Section S1: Solubility test

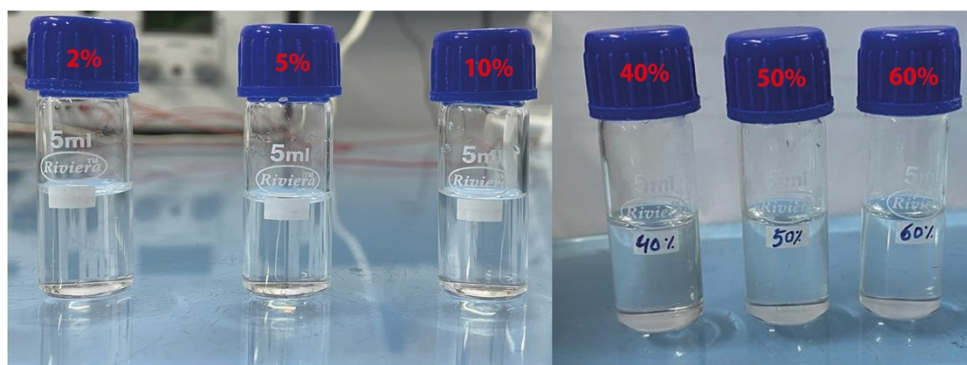

**Fig. S1:** Solubility test of different vol.% of methanol in 10 m  $\text{ZnCl}_2$ -WiSE. It depicts 10 m  $\text{ZnCl}_2$ -WiSE and methanol forming a homogeneous solution without precipitation or delamination.

## Section S2: Raman and Infrared Spectroscopy

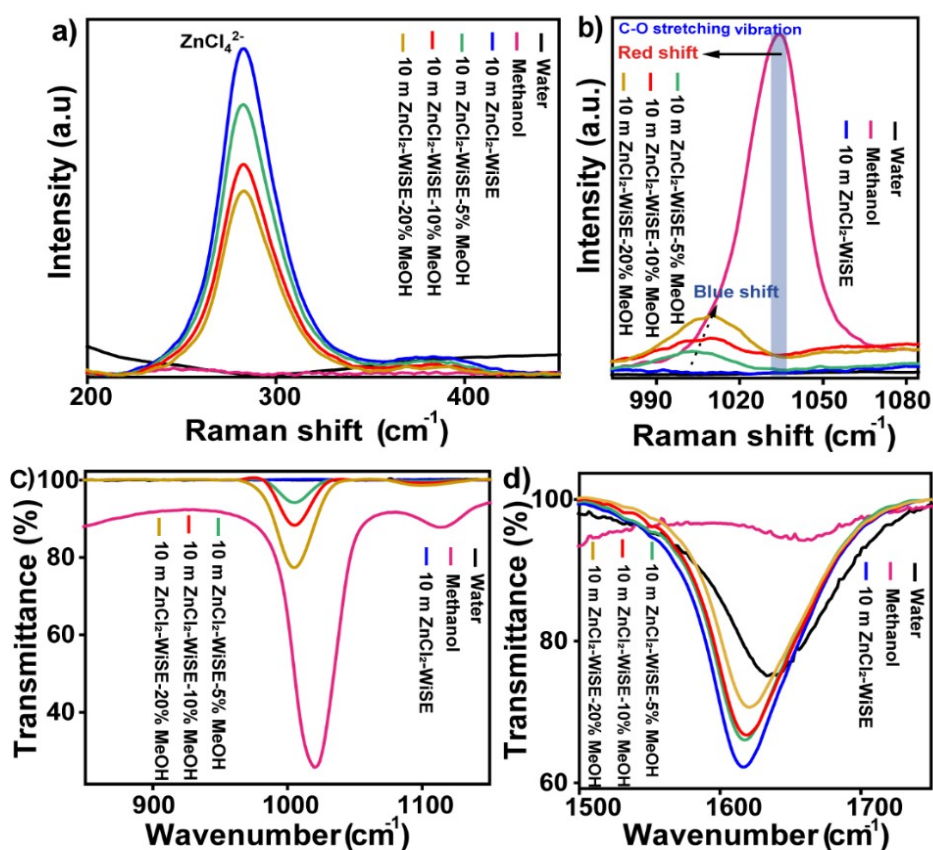

**Fig. S2:** (a & b) Raman spectra, and (c & d) FT-IR spectra of water, methanol, 10 m  $\text{ZnCl}_2$ -WiSE, 10 m  $\text{ZnCl}_2$ -WiSE-x% MeOH (x= 5, 10, 20) showing  $\text{ZnCl}_4^{2-}$  and C-O bond Raman shift peak, C-O bond stretching peak, O-H bond bending peak, respectively.

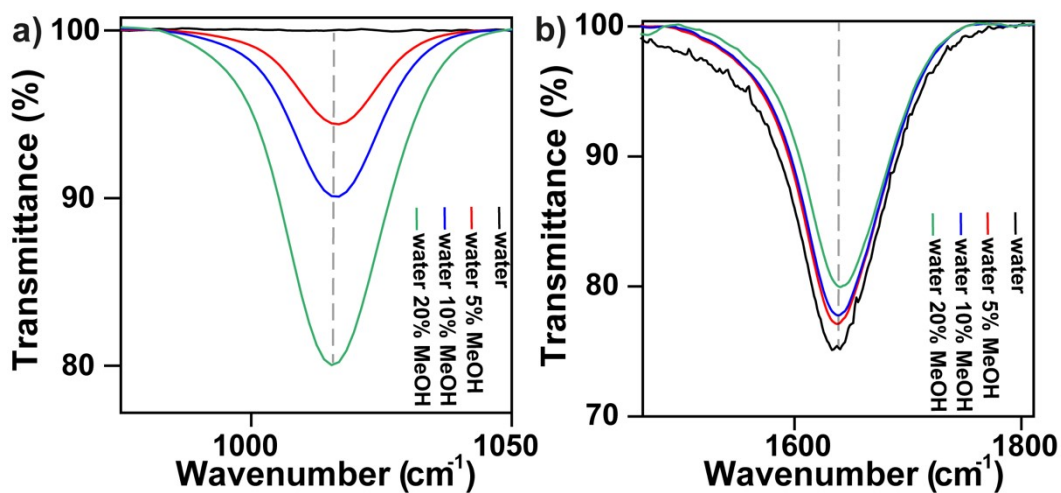

**Fig. S3:** FT-IR spectra of a mixture of pure water and different vol.% of pure methanol (a) C-O bond stretching, and (b) O-H bond bending vibration.

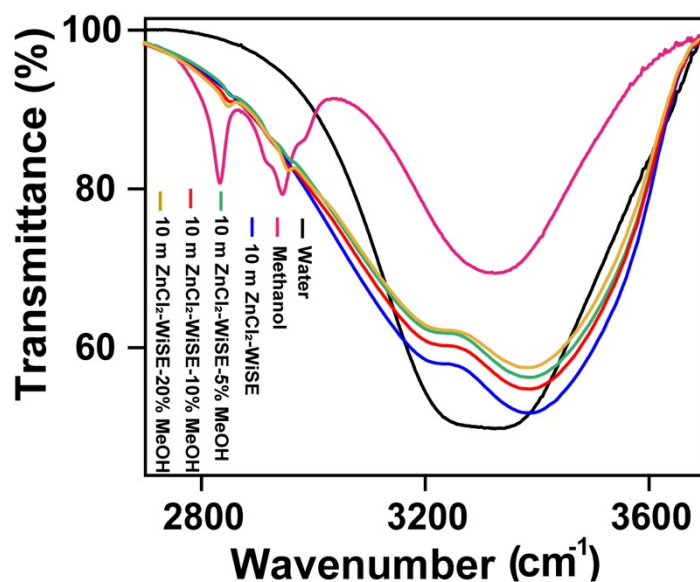

**Fig. S4:** FT-IR spectra of water, methanol, 10 m ZnCl<sub>2</sub>-WiSE and 10 m ZnCl<sub>2</sub>-WiSE-x % MeOH show the O-H bond stretching vibration shift.

### Section S3: Spatial Distribution Function Calculation

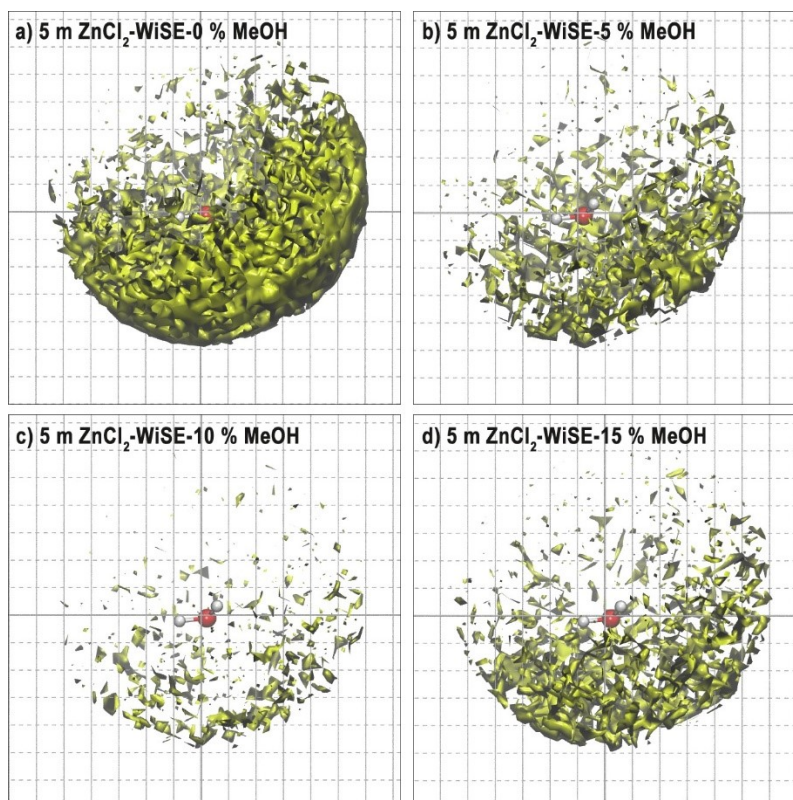

**Fig. S5:** Spatial distribution function (SDF) calculated from MD simulations to depict water-zinc interactions for 5 m ZnCl<sub>2</sub>-WiSE-*x* % MeOH with (a) *x*=0, (b) *x*=5, (c) *x*=10, and (d) *x*=15 [Colour scheme: H<sub>2</sub>O (Ball and Stick) H-White, O-Red; Zinc Ions (Isosurface)-Yellow-green (Iso value: 0.0032 Å<sup>3</sup>)].

### Section S4: X-Ray Diffraction

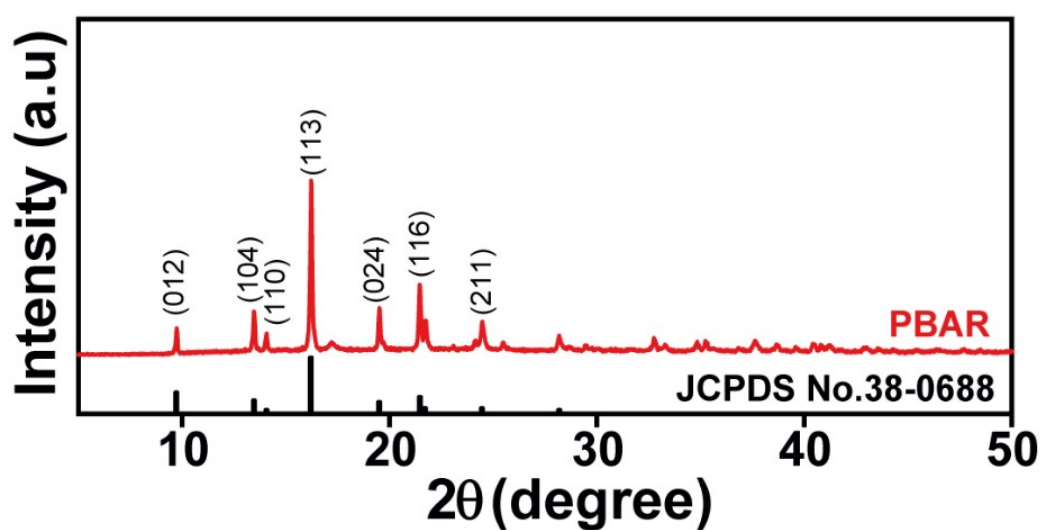

**Fig. S6:** Powder-XRD pattern of PBAR. The peaks are indexed to its JCPDS Card. No. 38-0688.

## Section S5: Field-Emission Scanning Electron Microscopy (FE-SEM)

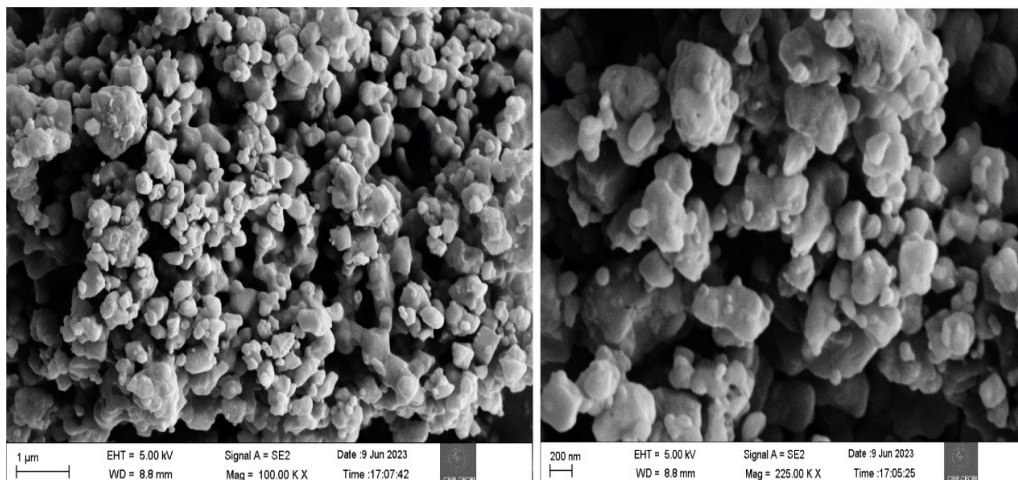

**Fig. S7:** Field emission scanning electron microscopy (FE-SEM) images of PBAR recorded at different magnifications.

## Section S6: Electrochemical Characterization

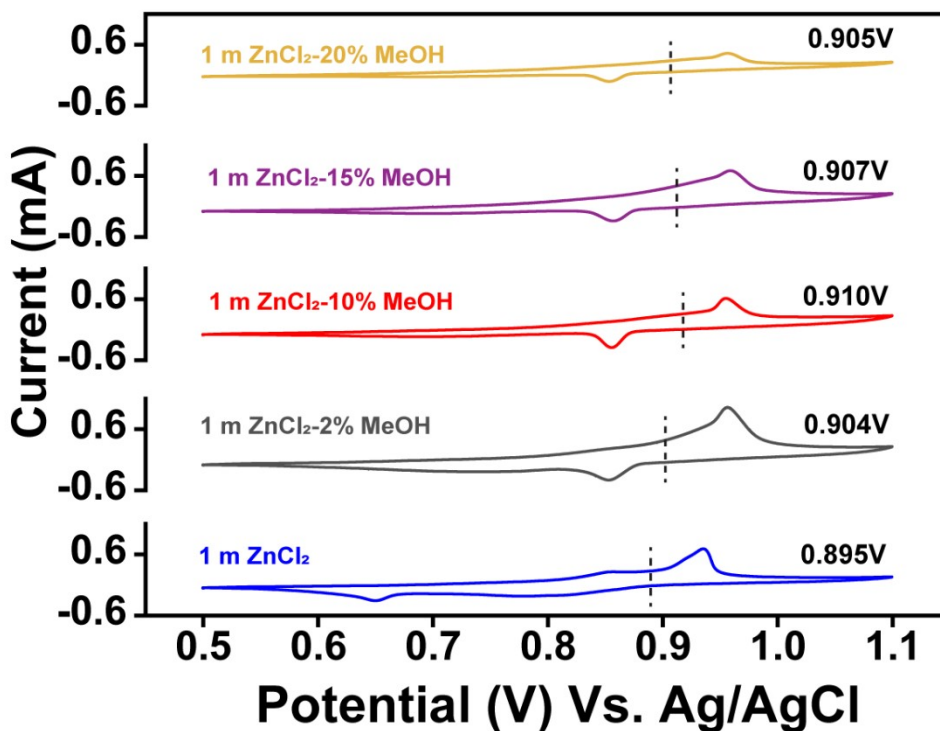

**Fig. S8:** Comparative cyclic voltammogram of PBAR in different vol.% of methanol added into 1m ZnCl<sub>2</sub> aqueous electrolyte (1 mZA). It shows that in 10 vol.% methanol addition, the redox potential is highest, 0.910 V vs Ag/AgCl.

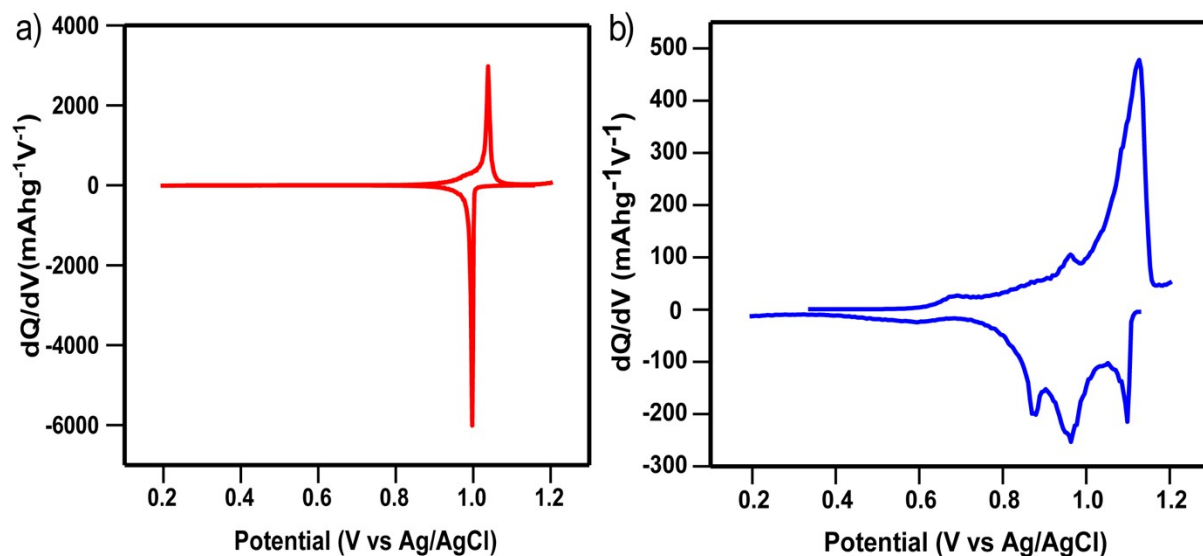

**Fig. S9:** Derivative plot of PBAR charge-discharge curve in a) 10 m  $\text{ZnCl}_2$ -WiSE-10 % MeOH, and b) 10 m  $\text{ZnCl}_2$ -WiSE.

### Section S7: Electrochemical Impedance Spectroscopy (EIS)

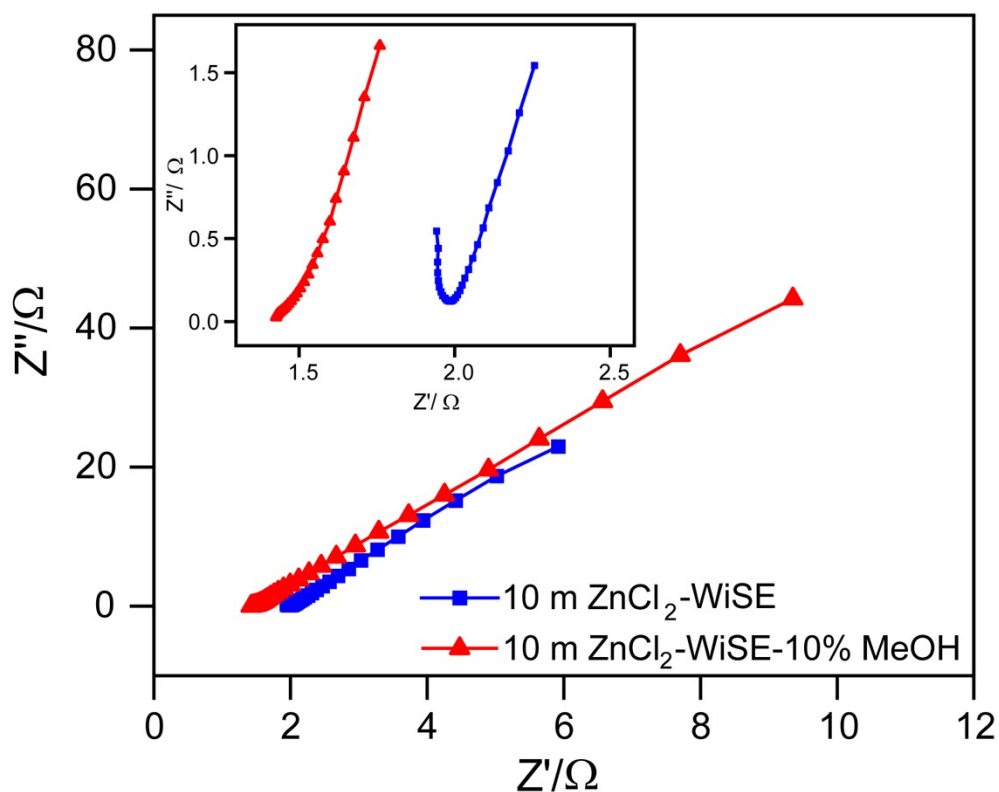

**Fig. S10:** Electrochemical impedance spectroscopy (EIS) data of 10 m  $\text{ZnCl}_2$ -WiSE and 10 m  $\text{ZnCl}_2$ -WiSE-10 % MeOH.

## Section S8: Galvanostatic Charge Discharge (GCD) Study

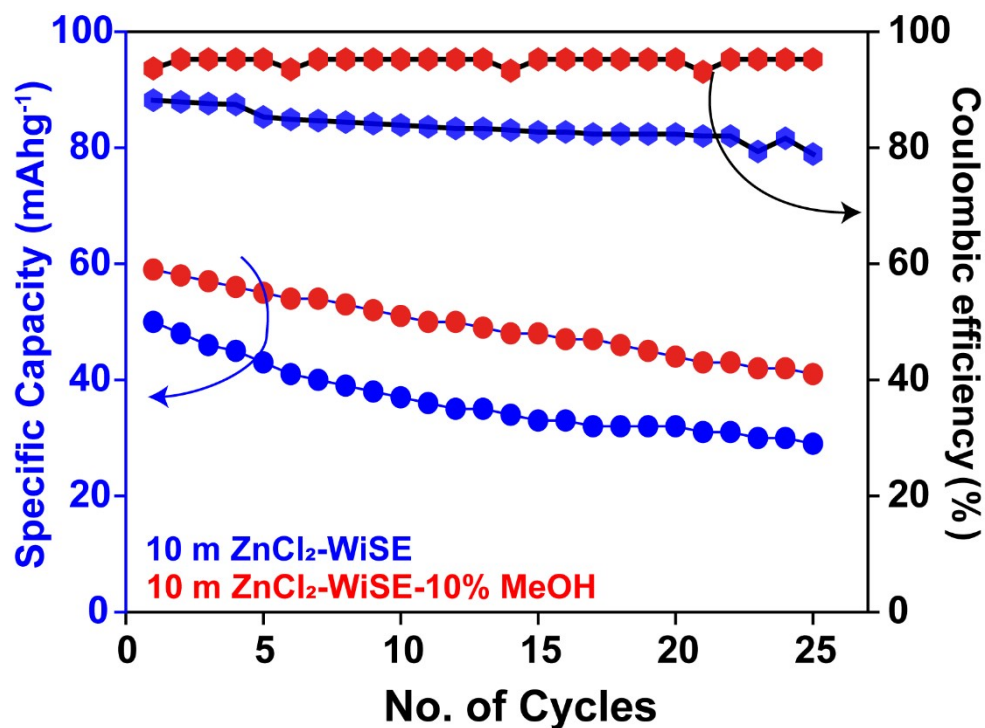

**Fig. S11:** Cycling stability of PBAR in 10 m ZnCl<sub>2</sub>-WiSE and 10 m ZnCl<sub>2</sub>-WiSE-10% MeOH at 3.3C-rate (1C-rate = 66 mAhg<sup>-1</sup>). Only discharge-specific capacity is shown here.

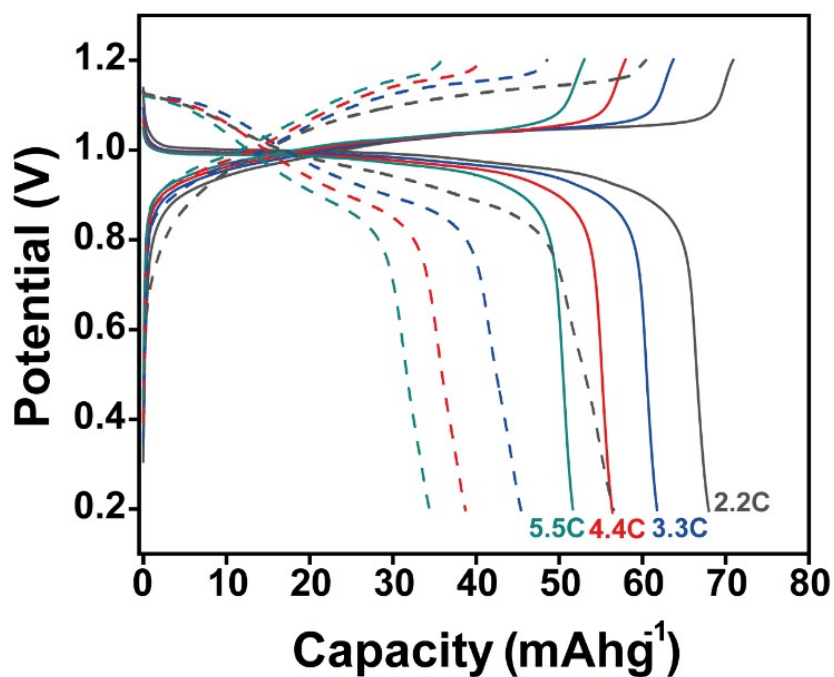

**Fig. S12:** Rate capability study comparison of PBAR in 10 m ZnCl<sub>2</sub>-WiSE (dashed line) and 10 m ZnCl<sub>2</sub>-WiSE-10% MeOH (solid line) (1C= 66 mAhg<sup>-1</sup>)



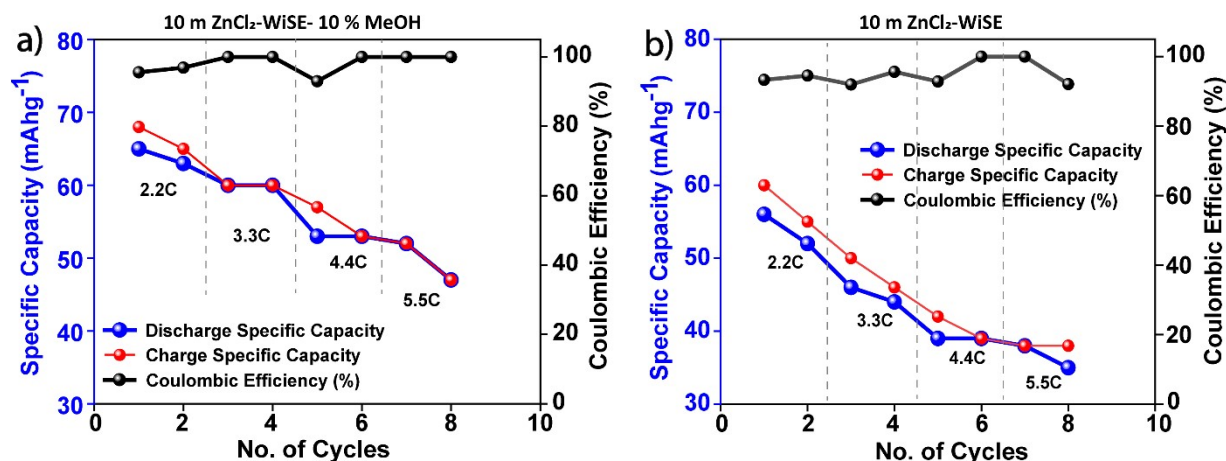

**Fig. S13:** Comparison of the rate capability study in 10 m  $\text{ZnCl}_2\text{-WiSE}$  and 10 m  $\text{ZnCl}_2\text{-WiSE-10% MeOH}$ . ( $1\text{C}=66 \text{ mAhg}^{-1}$ )

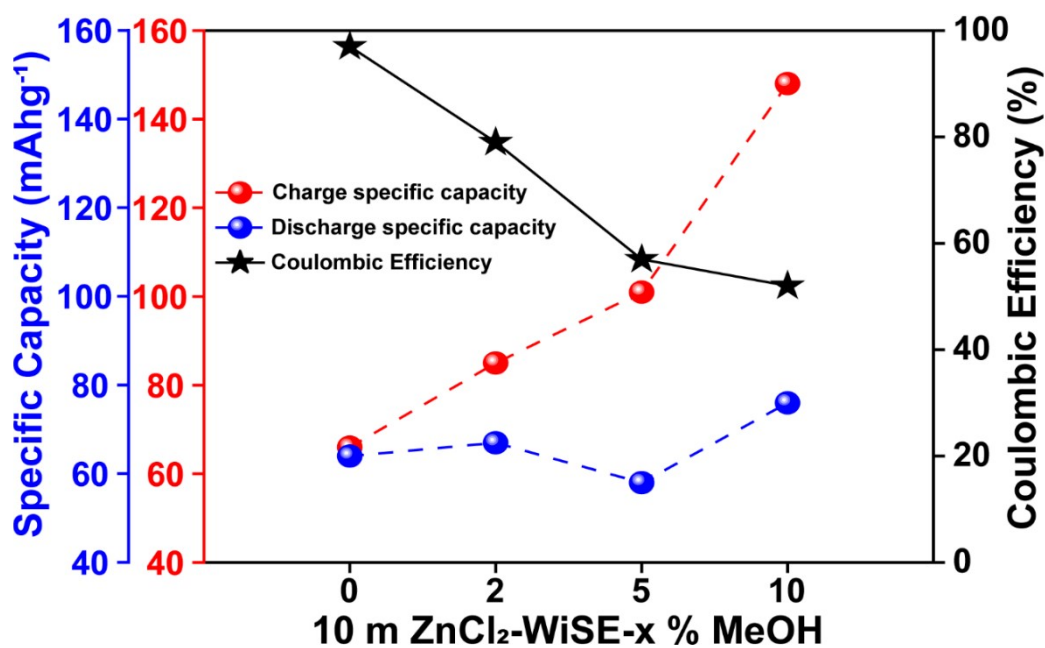

**Fig. S14:** Comparison of coulombic efficiency (CE) % of Zn//PBAR full cell, charge-discharge performed at 1C-rate ( $88 \text{ mAhg}^{-1}$ ) in various concentrations of antisolvent-based electrolyte, 10 m  $\text{ZnCl}_2\text{-WiSE-x% MeOH}$  ( $x=0,2,5,10$ ).

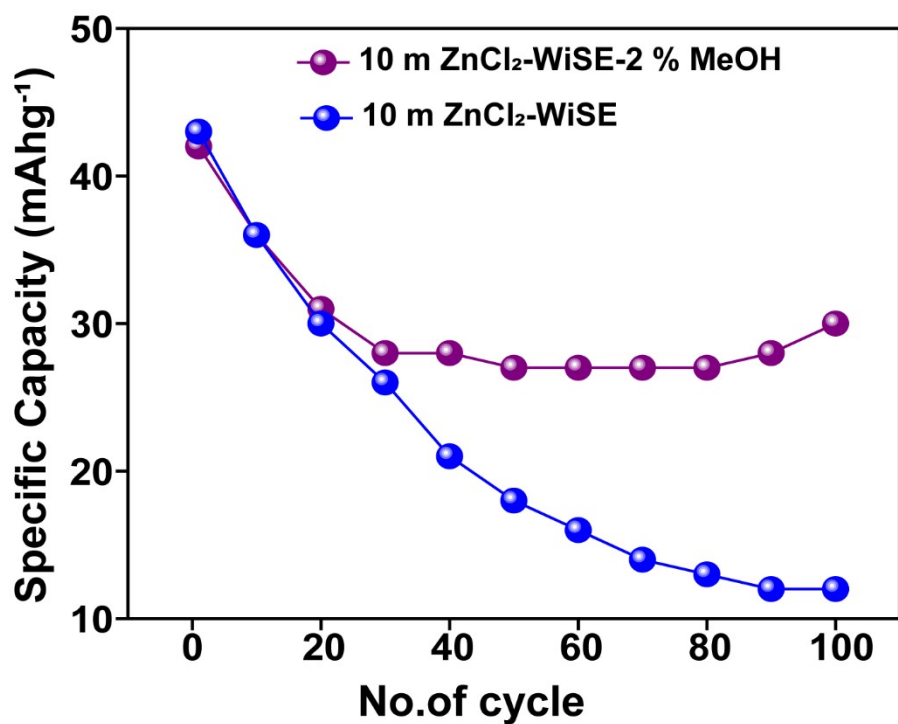

**Fig. S15:** Comparison of discharge capacity of cycling study in 10 m ZnCl<sub>2</sub>-WiSE and 10 m ZnCl<sub>2</sub>-WiSE-2% MeOH at 6C-rate (1C-rate=88mAhg<sup>-1</sup>)

### Section S9: Digital Photograph of Zn-foil after study

Zn foil in 10 m ZnCl<sub>2</sub>-WiSE      Zn foil in 10 m ZnCl<sub>2</sub>-2% WiSE

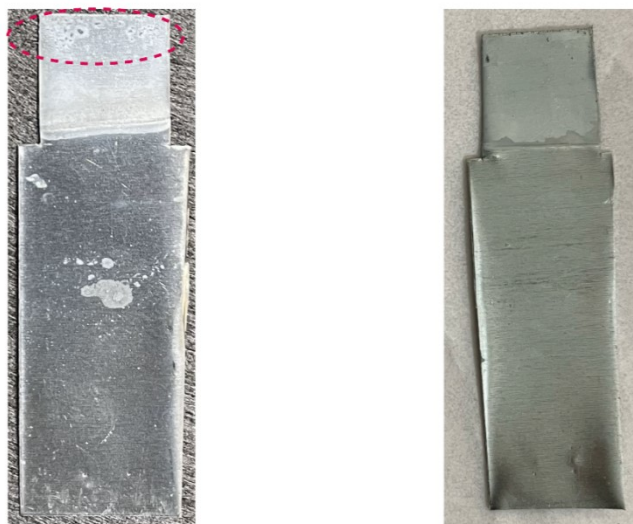

**Fig. S16:** Digital photographs of Zn-foil after cycling in 10 m ZnCl<sub>2</sub>-WiSE (left), and 10 m ZnCl<sub>2</sub>-WiSE-2% MeOH (right).

## Section S10: SEM images of Zn-foil after study

Zn foil in 10 m ZnCl<sub>2</sub>-WiSE

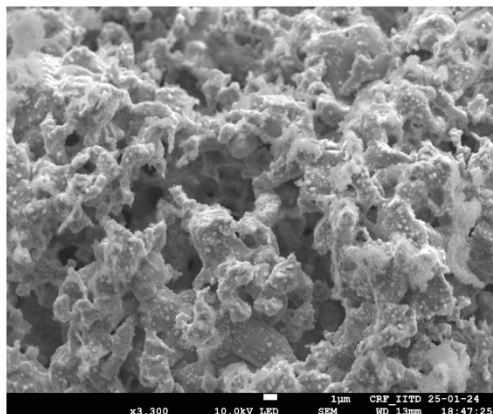

Zn foil in 10 m ZnCl<sub>2</sub>-2% WiSE

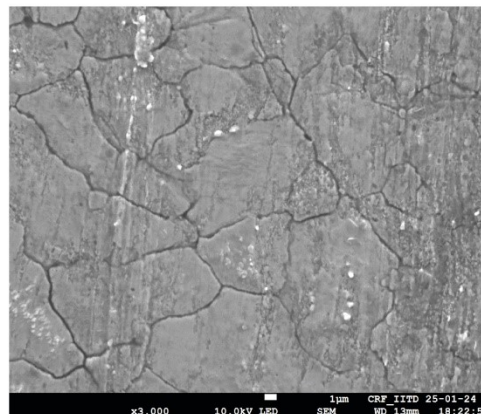

**Fig. S17:** Scanning electron microscopy (SEM) images of Zn anode after cycling in 10 m ZnCl<sub>2</sub>-WiSE (left), and 10 m ZnCl<sub>2</sub>-WiSE-2% MeOH (right).

## Section S11: Coordination number of different atoms

**Table S1:** Coordination number of different atoms at the inner solvation shell in 5 m ZnCl<sub>2</sub>-WiSE-x % MeOH and 10 m ZnCl<sub>2</sub>-WiSE-x % MeOH, respectively (cutoff distance is shown in parenthesis).

| 5 m ZnCl <sub>2</sub> -x % MeOH  | O <sub>Water</sub> -O <sub>Water</sub><br>(3.3 Å) | Zn-O <sub>Water</sub><br>(3.6 Å) | O <sub>Water</sub> -O <sub>MeOH</sub><br>(3.3 Å) | O <sub>MeOH</sub> -O <sub>MeOH</sub><br>(3.3 Å) |
|----------------------------------|---------------------------------------------------|----------------------------------|--------------------------------------------------|-------------------------------------------------|
| 0                                | 4.1                                               | 4.6                              | --                                               | --                                              |
| 5                                | 3.9                                               | 4.5                              | 0.07                                             | 0.02                                            |
| 10                               | 3.8                                               | 4.5                              | 0.15                                             | 0.08                                            |
| 15                               | 3.7                                               | 4.5                              | 0.21                                             | 0.14                                            |
| 10 m ZnCl <sub>2</sub> -x % MeOH | O <sub>Water</sub> -O <sub>Water</sub><br>(3.3 Å) | Zn-O <sub>Water</sub><br>(3.7 Å) | O <sub>Water</sub> -O <sub>MeOH</sub> (3.3 Å)    | O <sub>MeOH</sub> -O <sub>MeOH</sub> (3.3 Å)    |
| 0                                | 3.4                                               | 3.8                              | --                                               | --                                              |
| 5                                | 3.3                                               | 3.8                              | 0.08                                             | 0.02                                            |
| 10                               | 3.2                                               | 3.8                              | 0.16                                             | 0.07                                            |
| 15                               | 3.1                                               | 3.7                              | 0.24                                             | 0.15                                            |

O<sub>Water</sub>, O<sub>MeOH</sub>: oxygen atom of water and methanol molecules respectively.

## Section S12: Diffusion coefficients from MD simulation

**Table S2:** Diffusion coefficients from MD simulation for Zn<sup>2+</sup> ions, Cl<sup>-</sup> ions, water molecules, and methanol molecules for 5 m ZnCl<sub>2</sub>-WiSE-x % MeOH and 10 m ZnCl<sub>2</sub>-WiSE-x % MeOH.

| 5 m ZnCl <sub>2</sub> -WiSE-x% |                       | Diffusion Coefficients ( $\times 10^{-5} \text{ cm}^2 \text{ s}^{-1}$ ) |                   |                   |  |
|--------------------------------|-----------------------|-------------------------------------------------------------------------|-------------------|-------------------|--|
| MeOH                           | Zn <sup>2+</sup> ions | Cl <sup>-</sup> ions                                                    | Water             | Methanol          |  |
| x = 0                          | 0.1912 $\pm$ 0.018    | 0.3585 $\pm$ 0.009                                                      | 1.0421 $\pm$ 0.02 | --                |  |
| x = 5                          | 0.1503 $\pm$ 0.009    | 0.2813 $\pm$ 0.008                                                      | 0.8626 $\pm$ 0.02 | 0.6826 $\pm$ 0.15 |  |
| x = 10                         | 0.1545 $\pm$ 0.009    | 0.2621 $\pm$ 0.060                                                      | 0.8443 $\pm$ 0.07 | 0.5137 $\pm$ 0.06 |  |
| x = 15                         | 0.1497 $\pm$ 0.008    | 0.2594 $\pm$ 0.019                                                      | 0.9140 $\pm$ 0.01 | 0.5953 $\pm$ 0.09 |  |

  

| 10 M ZnCl <sub>2</sub> -x% |                       | Diffusion Coefficients ( $\times 10^{-6} \text{ cm}^2 \text{ s}^{-1}$ ) |                    |                   |  |
|----------------------------|-----------------------|-------------------------------------------------------------------------|--------------------|-------------------|--|
| MeOH                       | Zn <sup>2+</sup> ions | Cl <sup>-</sup> ions                                                    | Water              | Methanol          |  |
| x = 0                      | 0.0101 $\pm$ 0.002    | 0.0156 $\pm$ 0.002                                                      | 0.2960 $\pm$ 0.050 | --                |  |
| x = 5                      | 0.0135 $\pm$ 0.001    | 0.0206 $\pm$ 0.005                                                      | 0.3160 $\pm$ 0.003 | 0.077 $\pm$ 0.020 |  |
| x = 10                     | 0.0149 $\pm$ 0.001    | 0.0311 $\pm$ 0.001                                                      | 0.3940 $\pm$ 0.003 | 0.189 $\pm$ 0.010 |  |
| x = 15                     | 0.0306 $\pm$ 0.004    | 0.0447 $\pm$ 0.009                                                      | 0.5410 $\pm$ 0.021 | 0.243 $\pm$ 0.055 |  |

## Section S13: Efficiency of PBAR in half-cell and Zn//PBAR full-cell

**Table S3:** Discharge-specific capacity and coulombic efficiency of the PBAR tested in half-cell and full-cell configuration with different methanol vol.% in 10 m ZnCl<sub>2</sub>-WiSE.

| Methanol vol. % | PBAR half-cell @ 1C-rate (1C = 66 mA h g <sup>-1</sup> )       |                          |
|-----------------|----------------------------------------------------------------|--------------------------|
|                 | Discharge specific capacity (mA h g <sup>-1</sup> )            | Coulombic efficiency (%) |
| 0               | 44                                                             | 83                       |
| 10              | 66                                                             | 91                       |
| 15              | 61                                                             | 72                       |
| Methanol vol. % | Zn//PBAR Full cell @ 1.3C-rate (1C = 88 mA h g <sup>-1</sup> ) |                          |
|                 | Discharge specific capacity (mA h g <sup>-1</sup> )            | Coulombic efficiency (%) |
| 0               | 64                                                             | 97                       |
| 2               | 67                                                             | 79                       |
| 5               | 58                                                             | 57                       |
| 10              | 76                                                             | 52                       |
